# Supplementary material
Source: PubMed Central journal article supplement (PMC4160107)
Supplement: NIHMS606101-supplement-01.pdf [file NIHMS606101-supplement-01.pdf]

**Supplemental Data:**

**Table 3:** 72-hour return rates of older adults discharged from the ED arranged by anatomical fracture groups.

| <b>Anatomical Fracture Group (n, %):</b>              | <b>Fractured bone, n (% of group):</b> |
|-------------------------------------------------------|----------------------------------------|
| <b>Upper Arm (85, 27%)</b><br>Return rate: 2.3%       | Proximal humerus, 52 (73%)             |
|                                                       | Clavicle, 9 (13%)                      |
|                                                       | Scapula, 1 (1%)                        |
|                                                       | Distal humerus, 1 (1%)                 |
|                                                       | Olecranon, 3 (21%)                     |
|                                                       | Proximal radius, 10 (71%)              |
|                                                       | Proximal ulna, 1 (7%)                  |
| <b>Distal Forearm (93, 30%)</b><br>Return rate: 10.7% | Carpal bone, 4 (4%)                    |
|                                                       | Distal ulna only, 1 (1%)               |
|                                                       | Distal radius only, 46 (49%)           |
|                                                       | Distal radius/ulna, 42 (45%)           |
| <b>Hand (24, 8%)</b><br>Return rate: 12.5%            | Phalanx, 13 (54%)                      |
|                                                       | Metacarpal, 11 (46%)                   |
| <b>Ribs (38, 12%)</b><br>Return rate: 0%              | Single, 23 (61%)                       |
|                                                       | Multiple, 15 (39%)                     |
| <b>Upper leg (9, 3%)</b><br>Return rate: 11.1%        | Distal femur, 2 (22%)                  |
|                                                       | Proximal tibia or fibula, 7 (78%)      |
| <b>Ankle (39, 12%)</b><br>Return rate: 10.3%          | Distal fibula only, 26 (67%)           |
|                                                       | Distal tibia only, 1 (2%)              |
|                                                       | Distal tibia/fibula, 12 (31%)          |
| <b>Foot (27, 9%)</b><br>Return rate: 0%               | Phalanx, 8 (30%)                       |
|                                                       | Metatarsal, 18 (67%)                   |
|                                                       | Tarsal, 1 (3%)                         |
